# Supplementary material for: Fine-Tuning Quantitative Trait Loci Identified in Immortalized F2 Population Are Essential for Genomic Prediction of Hybrid Performance in Maize
Source: MDPI journal article supplement (doi:10.3390/agriculture14030340), 2024-02-21
Supplement: s1 [file s1]

**Figure S1**

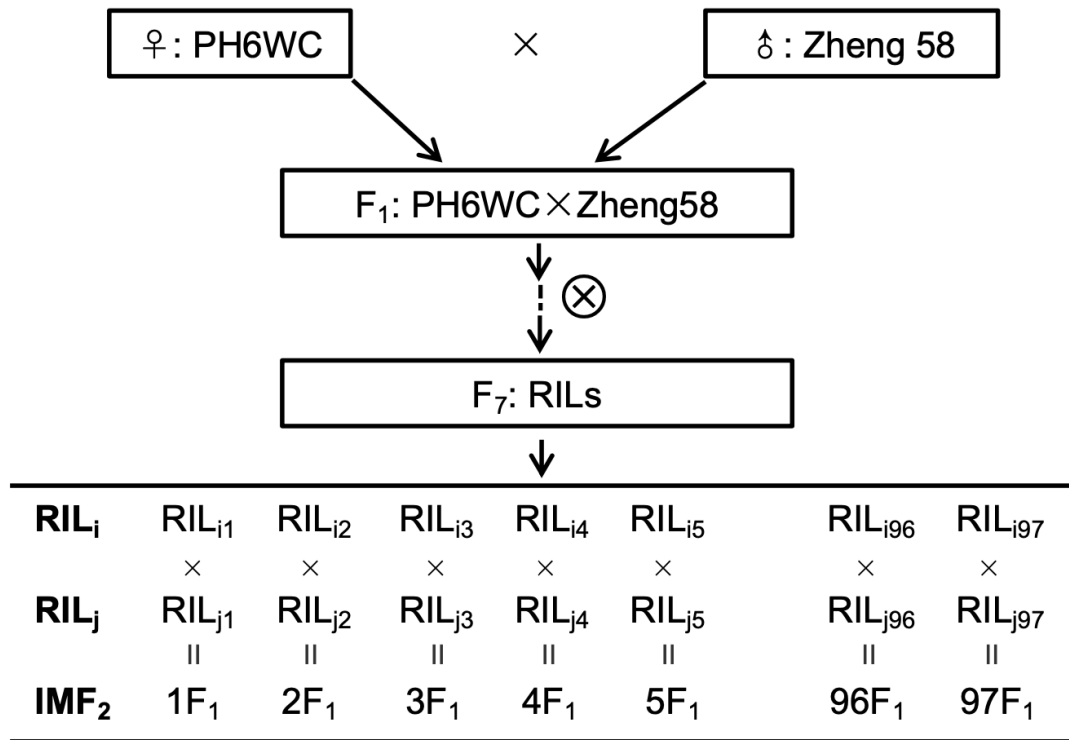

**Fig. S1** The flow chart of population development of RILs and IMF<sub>2</sub>. From F<sub>1</sub> to F<sub>7</sub> generation, the single-seed descent method was used. The 194 RILs were divided into two groups equally and randomly: RIL<sub>i</sub> and RIL<sub>j</sub>. This procedure was repeated three times, and finally 291 (3 × 97) IMF<sub>2</sub> were produced.

**Figure S2**

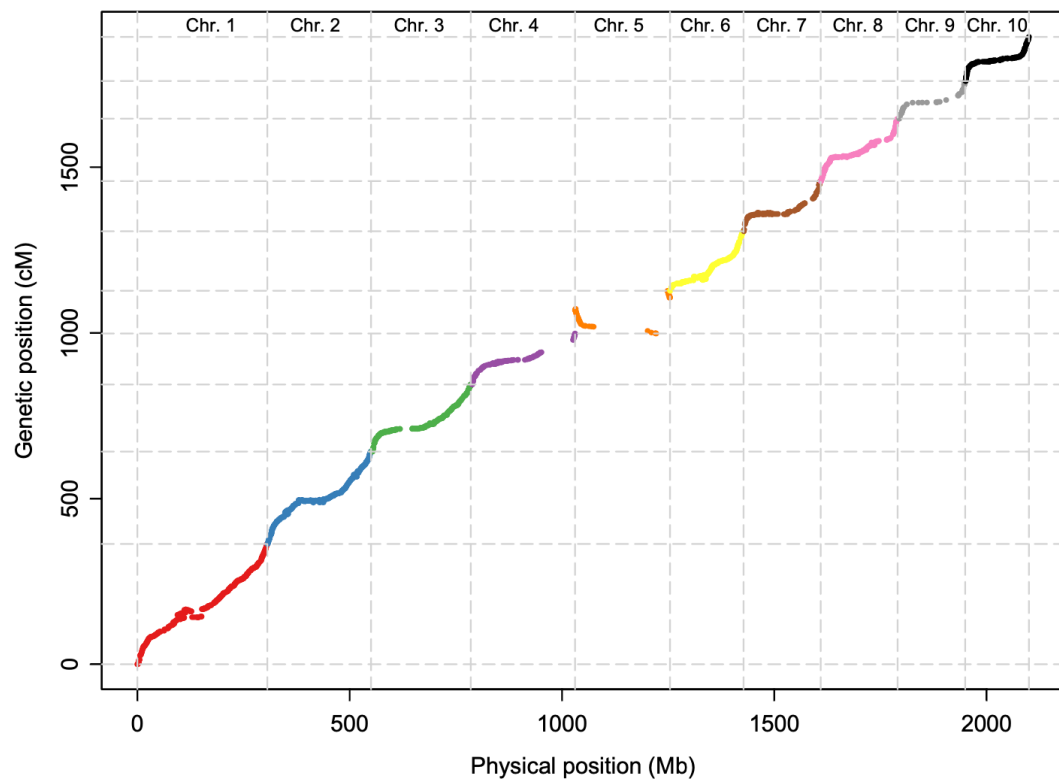

**Fig. S2** The marker distribution of genetic map and physical map in the IMF<sub>2</sub> population. Chr, chromosome.
