# Supplementary material for: Fine-Tuning Quantitative Trait Loci Identified in Immortalized F2 Population Are Essential for Genomic Prediction of Hybrid Performance in Maize
Source: MDPI journal article supplement (doi:10.3390/agriculture14030340), 2024-02-21
Supplement: s1 [file s1]

**Table S1** Reported genes related with PH in maize

| Gene name | Gene number V4 | Chr | V4-start  | V4-end    |
|-----------|----------------|-----|-----------|-----------|
| CNR13     | Zm00001d027722 | 1   | 12170863  | 12175121  |
| RPH1      | Zm00001d028073 | 1   | 21990180  | 22006881  |
| PHYB1     | Zm00001d028905 | 1   | 50443216  | 50455013  |
| BR2       | Zm00001d031871 | 1   | 204748411 | 204755635 |
| AN1       | Zm00001d032961 | 1   | 244858795 | 244867417 |
| BRD1      | Zm00001d033180 | 1   | 253162491 | 253166753 |
| GRAS8     | Zm00001d033680 | 1   | 270918085 | 270919977 |
| PHYC1     | Zm00001d034038 | 1   | 281978994 | 281984348 |
| AMP1      | Zm00001d034383 | 1   | 291472441 | 291480873 |
| Zfl2      | Zm00001d002449 | 2   | 12914091  | 12917068  |
| PRR95     | Zm00001d006212 | 2   | 201957643 | 201963953 |
| KOB1      | Zm00001d039284 | 3   | 1009359   | 1014295   |
| VATE      | Zm00001d039331 | 3   | 2013965   | 2017590   |
| D1        | Zm00001d039453 | 3   | 4745784   | 4752166   |
| GA3ox2    | Zm00001d039634 | 3   | 9745817   | 9747450   |
| MADS69    | Zm00001d042315 | 3   | 160591489 | 160591701 |
| TE1       | Zm00001d042445 | 3   | 167821561 | 167825000 |
| GA20ox3   | Zm00001d042611 | 3   | 173559174 | 173562022 |
| ELF3.1    | Zm00001d044232 | 3   | 222542813 | 222548835 |
| PHYC2     | Zm00001d013262 | 5   | 7372367   | 7382139   |
| D9        | Zm00001d013465 | 5   | 12228329  | 12230206  |
| NA2       | Zm00001d014887 | 5   | 67026171  | 67030023  |
| SPL12     | Zm00001d015410 | 5   | 89049594  | 89053097  |
| BV1       | Zm00001d016487 | 5   | 164505621 | 164508106 |
| COL3      | Zm00001d017176 | 5   | 188033144 | 188034257 |
| TOC1b     | Zm00001d017241 | 5   | 190060998 | 190063941 |
| MADS3     | Zm00001d018667 | 7   | 2191954   | 2203098   |
| NF-YC     | Zm00001d020874 | 7   | 135216263 | 135216865 |
| zmm28     | Zm00001d022088 | 7   | 169844061 | 169849722 |
| GlGZ1a    | Zm00001d008826 | 8   | 21787238  | 21795721  |
| EMF1L1    | Zm00001d010894 | 8   | 132435792 | 132443091 |
| Rap2.7    | Zm00001d010988 | 8   | 136011962 | 136013101 |
| GA20ox5   | Zm00001d012212 | 8   | 170115789 | 170118570 |
| GAD5      | Zm00001d045563 | 9   | 26822040  | 26825680  |
| PHYB2     | Zm00001d047632 | 9   | 137491058 | 137497818 |
| PRR7      | Zm00001d047761 | 9   | 141194049 | 141202987 |
| MADS1     | Zm00001d048474 | 9   | 156960598 | 156980213 |
| D53       | Zm00001d023208 | 10  | 130112    | 134842    |
| CCT10     | Zm00001d024909 | 10  | 94430850  | 94433404  |
| ACS7      | Zm00001d026060 | 10  | 137296427 | 137304511 |

**Table S2** The distribution of markers on the linkage map of the IMF<sub>2</sub> population

| Chr.  | Number of markers | Physical distance (Mb) | Genetic distance (cM) | Average distance (cM) | <5 cM Gap |
|-------|-------------------|------------------------|-----------------------|-----------------------|-----------|
| 1     | 649               | 306.04                 | 363.61                | 0.56                  | 646       |
| 2     | 576               | 244.07                 | 278.50                | 0.48                  | 575       |
| 3     | 449               | 231.84                 | 202.35                | 0.45                  | 446       |
| 4     | 177               | 241.96                 | 153.83                | 0.87                  | 173       |
| 5     | 68                | 223.53                 | 128.80                | 1.89                  | 62        |
| 6     | 354               | 173.17                 | 179.60                | 0.51                  | 352       |
| 7     | 208               | 181.01                 | 151.26                | 0.73                  | 201       |
| 8     | 342               | 180.80                 | 188.29                | 0.55                  | 338       |
| 9     | 63                | 155.18                 | 113.51                | 1.80                  | 57        |
| 10    | 183               | 149.04                 | 133.10                | 0.73                  | 180       |
| Total | 3069              | 2086.65                | 1892.83               | 0.86                  | 3030      |

**Table S3** Variance components and proportion of the phenotypic variance contributed by each variance component in the hybrid population

| Traits | $\delta^2_a$ | $\delta^2_d$ | $\delta^2_{aa}$ | $\delta^2_{ad}$ | $\delta^2_{dd}$ | $\delta^2_\varepsilon$ | $h^2_a$ | $h^2_d$ | $h^2_{aa}$ | $h^2_{ad}$ | $h^2_{dd}$ | $h^2$ |
|--------|--------------|--------------|-----------------|-----------------|-----------------|------------------------|---------|---------|------------|------------|------------|-------|
| PH     | 230.98       | 25.89        | 29.41           | 21.23           | 19.51           | 35.95                  | 0.636   | 0.071   | 0.081      | 0.058      | 0.054      | 0.900 |
| EH     | 76.12        | 5.61         | 6.55            | 5.93            | 4.73            | 10.94                  | 0.693   | 0.051   | 0.060      | 0.054      | 0.043      | 0.901 |
| PHAE   | 121.61       | 13.36        | 18.68           | 11.68           | 11.35           | 21.37                  | 0.614   | 0.067   | 0.094      | 0.059      | 0.057      | 0.891 |
| TL     | 7.87         | 1.08         | 1.07            | 0.91            | 0.84            | 1.83                   | 0.579   | 0.079   | 0.079      | 0.067      | 0.062      | 0.866 |
| AENN   | 0.14         | 0.01         | 0.02            | 0.02            | 0.01            | 0.03                   | 0.612   | 0.065   | 0.085      | 0.068      | 0.056      | 0.886 |
| AILAE  | 1.14         | 0.19         | 0.27            | 0.16            | 0.15            | 0.29                   | 0.521   | 0.085   | 0.123      | 0.072      | 0.067      | 0.868 |

Notes: All genetic variance  $\sigma^2$  is calculated by  $\sigma^2 = \sigma_a^2 + \sigma_d^2 + \sigma_{aa}^2 + \sigma_{ad}^2 + \sigma_{dd}^2 + \sigma_\varepsilon^2$ ;

$h_a^2$ , the genetic proportion of additive effect, calculated by  $h_a^2 = \sigma_a^2/\sigma^2$ ;

$h_d^2$ , the genetic proportion of dominance effect, calculated by  $h_d^2 = \sigma_d^2/\sigma^2$ ;

$h_{aa}^2$ , the genetic proportion of additive-by-additive effect, calculated by  $h_{aa}^2 = \sigma_{aa}^2/\sigma^2$ ;

$h_{ad}^2$ , the genetic proportion of additive-by-dominance effect, calculated by  $h_{ad}^2 = \sigma_{ad}^2/\sigma^2$ ;

$h_{dd}^2$ , the genetic proportion of dominance-by-dominance effect, calculated by  $h_{dd}^2 = \sigma_{dd}^2/\sigma^2$ .

PH, plant height; EH, ear height; PHAE, plant height above-ear; TL, tassel length;

AENN, above-ear node number; AILAE, average internode length above-ear.

**Table S4** QTL mapping results of the six traits in the IMF<sub>2</sub> population

| Env. | Trait | Chr. | Pos. | Left Marker  | Right Marker | LOD  | PVE(%) | Add.  | Dom.  | Left CI | Right CI |
|------|-------|------|------|--------------|--------------|------|--------|-------|-------|---------|----------|
| BLUE | PH    | 1    | 47   | S1_11671250  | S1_12716397  | 8.4  | 2.6    | -4.71 | 0.34  | 45.5    | 47.5     |
| BLUE | PH    | 1    | 141  | S1_110002889 | S1_143444026 | 7.9  | 2.4    | -4.04 | 0.84  | 140.5   | 141.5    |
| BLUE | PH    | 1    | 289  | S1_269329879 | S1_270329585 | 26.2 | 9.3    | -8.23 | 0.91  | 288.5   | 289.5    |
| BLUE | PH    | 2    | 83   | S2_39095425  | S2_39116916  | 5.7  | 1.7    | -3.73 | -0.14 | 82.5    | 84.5     |
| BLUE | PH    | 2    | 162  | S2_177887793 | S2_178768823 | 18.6 | 6.0    | 6.60  | 0.44  | 161.5   | 162.5    |
| BLUE | PH    | 2    | 170  | S2_184489684 | S2_184507538 | 18.2 | 5.9    | -6.47 | 1.48  | 168.5   | 170.5    |
| BLUE | PH    | 2    | 191  | S2_194953435 | S2_195895088 | 11.2 | 3.4    | -4.89 | 2.16  | 188.5   | 192.5    |
| BLUE | PH    | 3    | 142  | S3_202756748 | S3_204515987 | 38.7 | 15.3   | 10.70 | 1.13  | 141.5   | 142.5    |
| BLUE | PH    | 3    | 144  | S3_204886397 | S3_205197635 | 16.7 | 5.5    | -6.40 | 1.23  | 143.5   | 144.5    |
| BLUE | PH    | 4    | 49   | S4_24524787  | S4_25776067  | 10.1 | 3.1    | -5.02 | -0.17 | 47.5    | 49.5     |
| BLUE | PH    | 5    | 0    | S5_191242515 | S5_189324793 | 12.7 | 3.9    | -5.59 | 1.20  | 0       | 0.5      |
| BLUE | PH    | 6    | 72   | S6_98444313  | S6_100494561 | 15.5 | 4.9    | -6.31 | 0.73  | 71.5    | 73.5     |
| BLUE | PH    | 7    | 57   | S7_35657556  | S7_103970149 | 5.5  | 1.7    | -3.85 | 0.41  | 55.5    | 57.5     |
| BLUE | PH    | 7    | 148  | S7_179889058 | S7_179890872 | 6.0  | 1.8    | -3.75 | 0.42  | 147.5   | 149.5    |
| BLUE | PH    | 8    | 124  | S8_136858916 | S8_155239245 | 7.1  | 2.0    | -1.78 | 5.62  | 122.5   | 124.5    |
| BLUE | PH    | 8    | 188  | S8_179303074 | S8_181044202 | 6.3  | 1.9    | 1.05  | 5.43  | 186.5   | 188      |
| BLUE | EH    | 2    | 53   | S2_14173718  | S2_15005821  | 6.3  | 5.0    | 2.47  | 1.43  | 51.5    | 54.5     |
| BLUE | EH    | 2    | 189  | S2_194070269 | S2_194953435 | 9.5  | 7.3    | -2.94 | 1.29  | 188.5   | 191.5    |
| BLUE | EH    | 2    | 277  | S2_242359991 | S2_243177289 | 11.2 | 8.9    | 3.24  | 1.31  | 275.5   | 278      |
| BLUE | EH    | 3    | 46   | S3_16736078  | S3_16972714  | 5.0  | 3.8    | -2.10 | 1.50  | 42.5    | 48.5     |
| BLUE | EH    | 3    | 78   | S3_129403674 | S3_130034086 | 14.0 | 11.7   | 3.81  | 0.85  | 77.5    | 78.5     |
| BLUE | EH    | 4    | 22   | S4_7358055   | S4_7659118   | 4.5  | 3.4    | 2.19  | -0.52 | 21.5    | 23.5     |
| BLUE | EH    | 4    | 58   | S4_32408665  | S4_36804605  | 8.7  | 6.7    | -2.80 | 1.04  | 56.5    | 59.5     |
| BLUE | EH    | 5    | 3    | S5_179758728 | S5_170980192 | 5.9  | 4.4    | -2.40 | 0.57  | 0       | 7.5      |
| BLUE | EH    | 6    | 68   | S6_96214388  | S6_99027644  | 4.9  | 4.1    | -2.33 | 0.82  | 65.5    | 69.5     |
| BLUE | EH    | 7    | 4    | S7_730311    | S7_1414806   | 5.3  | 4.1    | 1.93  | -1.32 | 0       | 4.5      |
| BLUE | PHAE  | 1    | 141  | S1_110002889 | S1_143444026 | 9.9  | 6.4    | -4.15 | 0.48  | 140.5   | 141.5    |
| BLUE | PHAE  | 1    | 289  | S1_269329879 | S1_270329585 | 20.2 | 13.7   | -6.08 | 1.53  | 288.5   | 289.5    |
| BLUE | PHAE  | 2    | 12   | S2_2805295   | S2_3408488   | 8.3  | 5.1    | -4.22 | -0.13 | 11.5    | 12.5     |
| BLUE | PHAE  | 2    | 169  | S2_183498880 | S2_184489684 | 8.9  | 5.6    | -3.85 | 1.14  | 168.5   | 170.5    |
| BLUE | PHAE  | 2    | 273  | S2_241126960 | S2_241790578 | 10.3 | 6.8    | -4.45 | -0.45 | 270.5   | 274.5    |
| BLUE | PHAE  | 4    | 47   | S4_22850445  | S4_24524787  | 5.6  | 3.5    | -3.27 | 0.13  | 44.5    | 49.5     |
| BLUE | PHAE  | 6    | 73   | S6_98444313  | S6_100494561 | 6.2  | 3.9    | -3.21 | 1.83  | 71.5    | 74.5     |
| BLUE | PHAE  | 6    | 114  | S6_151999143 | S6_152608758 | 12.7 | 8.4    | 5.14  | 1.08  | 112.5   | 115.5    |
| BLUE | PHAE  | 7    | 140  | S7_177749949 | S7_178153031 | 5.7  | 3.4    | -2.96 | -1.95 | 139.5   | 140.5    |
| BLUE | PHAE  | 8    | 123  | S8_136858916 | S8_155239245 | 4.3  | 2.8    | 0.30  | 4.06  | 121.5   | 124.5    |
| BLUE | PHAE  | 8    | 188  | S8_179303074 | S8_181044202 | 4.5  | 2.7    | 2.75  | 1.93  | 186.5   | 188      |
| BLUE | TL    | 1    | 41   | S1_10852905  | S1_11128611  | 5.2  | 2.7    | -0.80 | 0.41  | 38.5    | 42.5     |
| BLUE | TL    | 1    | 199  | S1_192436850 | S1_192760939 | 5.9  | 2.9    | -0.89 | 0.21  | 197.5   | 199.5    |
| BLUE | TL    | 1    | 283  | S1_266537872 | S1_267030175 | 7.7  | 3.9    | 0.98  | 0.01  | 282.5   | 283.5    |
| BLUE | TL    | 1    | 290  | S1_273002635 | S1_273836450 | 26.5 | 15.8   | -1.99 | 0.28  | 289.5   | 291.5    |
| BLUE | TL    | 2    | 0    | S2_41033     | S2_1083914   | 6.9  | 3.4    | -0.96 | 0.49  | 0       | 1.5      |

|      |       |    |     |               |               |      |      |       |       |       |       |
|------|-------|----|-----|---------------|---------------|------|------|-------|-------|-------|-------|
| BLUE | TL    | 2  | 250 | S2_235056628  | S2_235788869  | 8.7  | 4.5  | -1.07 | -0.19 | 249.5 | 250.5 |
| BLUE | TL    | 2  | 272 | S2_241126960  | S2_241790578  | 7.5  | 4.0  | -0.97 | -0.37 | 269.5 | 274.5 |
| BLUE | TL    | 3  | 175 | S3_224216705  | S3_225346839  | 4.4  | 2.2  | 0.76  | 0.04  | 174.5 | 175.5 |
| BLUE | TL    | 4  | 0   | S4_3571676    | S4_4611545    | 5.5  | 2.7  | 0.87  | 0.25  | 0     | 4.5   |
| BLUE | TL    | 6  | 99  | S6_138542031  | S6_139900816  | 11.1 | 5.8  | 1.24  | -0.56 | 98.5  | 99.5  |
| BLUE | TL    | 7  | 47  | S7_13644694   | S7_15921898   | 17.5 | 9.9  | -1.63 | -0.42 | 45.5  | 47.5  |
| BLUE | TL    | 7  | 140 | S7_177749949  | S7_178153031  | 9.8  | 5.0  | -1.16 | 0.30  | 139.5 | 140.5 |
| BLUE | AENN  | 1  | 28  | S1_7345988    | S1_8152527    | 4.1  | 0.6  | -0.09 | -0.03 | 27.5  | 29.5  |
| BLUE | AENN  | 1  | 360 | S1_304587897  | S1_304932473  | 7.0  | 1.1  | -0.12 | 0.01  | 358.5 | 360.5 |
| BLUE | AENN  | 2  | 278 | S2_243537180  | S2_244109746  | 12.6 | 2.0  | -0.17 | -0.03 | 277.5 | 278   |
| BLUE | AENN  | 3  | 150 | S3_207962098  | S3_208325684  | 13.2 | 2.0  | 0.17  | 0.03  | 149.5 | 151.5 |
| BLUE | AENN  | 4  | 57  | S4_32408665   | S4_36804605   | 10.3 | 1.6  | -0.15 | 0.01  | 56.5  | 59.5  |
| BLUE | AENN  | 4  | 141 | S4_242286166  | S4_242888414  | 4.9  | 0.7  | 0.10  | 0.00  | 139.5 | 141.5 |
| BLUE | AENN  | 5  | 0   | S5_191242515  | S5_189324793  | 8.0  | 1.2  | -0.13 | -0.03 | 0     | 0.5   |
| BLUE | AENN  | 6  | 35  | S6_76077187   | S6_83127386   | 59.1 | 14.5 | -0.44 | 0.00  | 34.5  | 35.5  |
| BLUE | AENN  | 6  | 46  | S6_73928215   | S6_82194026   | 74.4 | 20.9 | 0.55  | -0.01 | 45.5  | 46.5  |
| BLUE | AENN  | 8  | 54  | S8_17292863   | S8_18462606   | 56.1 | 12.8 | 0.42  | -0.05 | 52.5  | 54.5  |
| BLUE | AENN  | 8  | 56  | S8_18951887   | S8_20499409   | 27.6 | 4.9  | -0.26 | -0.04 | 55.5  | 56.5  |
| BLUE | AENN  | 9  | 87  | S9_153044666  | S9_154838789  | 10.8 | 1.7  | -0.15 | 0.02  | 86.5  | 88.5  |
| BLUE | AILAE | 1  | 89  | S1_42291652   | S1_43645958   | 4.8  | 2.0  | -0.29 | 0.07  | 88.5  | 89.5  |
| BLUE | AILAE | 1  | 141 | S1_110002889  | S1_143444026  | 14.5 | 6.6  | -0.50 | 0.13  | 140.5 | 141.5 |
| BLUE | AILAE | 1  | 219 | S1_210138844  | S1_211116324  | 14.2 | 6.4  | -0.50 | 0.09  | 218.5 | 220.5 |
| BLUE | AILAE | 1  | 292 | S1_273608504  | S1_275164590  | 10.9 | 4.7  | -0.43 | 0.11  | 291.5 | 292.5 |
| BLUE | AILAE | 2  | 17  | S2_4668065    | S2_4864056    | 5.1  | 2.1  | -0.29 | -0.13 | 15.5  | 17.5  |
| BLUE | AILAE | 2  | 54  | S2_14173718   | S2_15005821   | 10.4 | 4.6  | 0.45  | 0.07  | 52.5  | 54.5  |
| BLUE | AILAE | 2  | 87  | S2_41241033   | S2_41648818   | 30.6 | 15.8 | -0.87 | 0.07  | 86.5  | 88.5  |
| BLUE | AILAE | 2  | 185 | S2_190810969  | S2_191462633  | 8.5  | 3.7  | -0.41 | -0.03 | 183.5 | 185.5 |
| BLUE | AILAE | 4  | 78  | S4_135623178  | S4_135622314  | 7.0  | 2.9  | -0.35 | 0.09  | 77.5  | 78.5  |
| BLUE | AILAE | 6  | 1   | S6_479526     | S6_2409227    | 5.0  | 2.1  | -0.06 | -0.42 | 0     | 3.5   |
| BLUE | AILAE | 6  | 61  | S6_94245221   | S6_95056892   | 17.5 | 8.3  | -0.60 | 0.18  | 59.5  | 62.5  |
| BLUE | AILAE | 6  | 123 | S6_156584507  | S6_157124016  | 5.4  | 2.3  | 0.31  | 0.01  | 121.5 | 124.5 |
| BLUE | AILAE | 7  | 105 | S7_167277540  | S7_170257603  | 7.3  | 3.1  | 0.38  | -0.09 | 104.5 | 107.5 |
| BLUE | AILAE | 10 | 27  | S10_4281712   | S10_4476300   | 10.6 | 4.7  | -0.46 | -0.15 | 24.5  | 27.5  |
| BLUE | AILAE | 10 | 97  | S10_140119850 | S10_140696756 | 9.5  | 4.1  | 0.43  | 0.01  | 95.5  | 98.5  |
| 2ILY | PH    | 1  | 105 | S1_62856959   | S1_64040706   | 10.0 | 8.9  | -7.33 | -0.99 | 102.5 | 107.5 |
| 2ILY | PH    | 1  | 292 | S1_273608504  | S1_275164590  | 9.7  | 8.4  | -6.71 | 2.30  | 291.5 | 292.5 |
| 2ILY | PH    | 2  | 184 | S2_190810969  | S2_191462633  | 9.0  | 7.9  | -6.68 | 2.63  | 182.5 | 185.5 |
| 2ILY | PH    | 3  | 138 | S3_198495467  | S3_199019661  | 8.5  | 7.2  | 6.42  | 0.89  | 136.5 | 138.5 |
| 2ILY | PH    | 4  | 58  | S4_32408665   | S4_36804605   | 9.6  | 8.1  | -6.60 | 2.93  | 56.5  | 58.5  |
| 2ILY | PH    | 5  | 0   | S5_191242515  | S5_189324793  | 4.3  | 3.5  | -4.41 | 2.49  | 0     | 0.5   |
| 2ILY | PH    | 6  | 60  | S6_93872487   | S6_94245221   | 4.2  | 3.5  | -4.72 | -1.12 | 59.5  | 62.5  |
| 2ILY | EH    | 2  | 233 | S2_223195826  | S2_223464405  | 10.3 | 7.8  | -4.24 | 1.15  | 232.5 | 234.5 |
| 2ILY | EH    | 2  | 269 | S2_239761722  | S2_241119338  | 12.0 | 9.2  | 4.47  | 1.17  | 267.5 | 269.5 |
| 2ILY | EH    | 3  | 47  | S3_16736078   | S3_16972714   | 5.8  | 4.4  | -3.19 | 1.49  | 45.5  | 48.5  |

|      |       |    |     |              |              |      |      |        |       |       |       |
|------|-------|----|-----|--------------|--------------|------|------|--------|-------|-------|-------|
| 21LY | EH    | 3  | 78  | S3_129403674 | S3_130034086 | 10.1 | 7.9  | 4.29   | 0.45  | 77.5  | 78.5  |
| 21LY | EH    | 10 | 2   | S10_1296064  | S10_1562457  | 5.3  | 3.8  | 2.95   | -0.35 | 0     | 3.5   |
| 21LY | PHAE  | 1  | 105 | S1_62856959  | S1_64040706  | 11.6 | 12.6 | -6.15  | 1.05  | 102.5 | 107.5 |
| 21LY | PHAE  | 1  | 134 | S1_93741990  | S1_101472296 | 4.6  | 4.5  | -0.36  | 5.69  | 133.5 | 135.5 |
| 21LY | PHAE  | 1  | 292 | S1_273608504 | S1_275164590 | 5.4  | 5.3  | -4.04  | 0.75  | 291.5 | 292.5 |
| 21LY | PHAE  | 2  | 12  | S2_2805295   | S2_3408488   | 4.3  | 4.2  | -3.85  | -1.22 | 10.5  | 12.5  |
| 21LY | PHAE  | 2  | 184 | S2_190810969 | S2_191462633 | 6.1  | 6.3  | -4.46  | 1.26  | 182.5 | 185.5 |
| 21LY | PHAE  | 4  | 76  | S4_110627655 | S4_133437637 | 5.9  | 5.9  | -4.35  | 1.07  | 74.5  | 77.5  |
| 21LY | TL    | 1  | 139 | S1_98961699  | S1_105867233 | 4.6  | 2.3  | -1.12  | -0.10 | 137.5 | 139.5 |
| 21LY | TL    | 1  | 295 | S1_279919454 | S1_279982555 | 6.0  | 3.0  | -1.24  | 0.50  | 294.5 | 295.5 |
| 21LY | TL    | 4  | 0   | S4_3571676   | S4_4611545   | 4.8  | 2.4  | 1.22   | 0.38  | 0     | 4.5   |
| 21LY | TL    | 7  | 141 | S7_178253113 | S7_178653254 | 30.8 | 19.4 | -3.55  | 0.12  | 140.5 | 141.5 |
| 21LY | TL    | 10 | 34  | S10_5605708  | S10_7375307  | 6.6  | 3.4  | -1.48  | -0.03 | 33.5  | 35.5  |
| 21LY | AENN  | 2  | 16  | S2_4668065   | S2_4864056   | 8.7  | 1.8  | -0.18  | -0.02 | 15.5  | 16.5  |
| 21LY | AENN  | 2  | 278 | S2_243537180 | S2_244109746 | 5.6  | 1.2  | -0.14  | -0.01 | 277.5 | 278   |
| 21LY | AENN  | 3  | 138 | S3_198495467 | S3_199019661 | 12.0 | 2.5  | 0.20   | 0.02  | 137.5 | 138.5 |
| 21LY | AENN  | 4  | 76  | S4_110627655 | S4_133437637 | 70.3 | 25.6 | -0.68  | -0.03 | 75.5  | 76.5  |
| 21LY | AENN  | 6  | 26  | S6_28516337  | S6_30754790  | 8.7  | 1.8  | 0.17   | 0.00  | 25.5  | 26.5  |
| 21LY | AILAE | 1  | 113 | S1_73973616  | S1_74159005  | 10.1 | 10.7 | -0.59  | 0.23  | 112.5 | 113.5 |
| 21LY | AILAE | 1  | 272 | S1_257870704 | S1_257980045 | 14.1 | 15.5 | -0.81  | 0.12  | 271.5 | 273.5 |
| 21LY | AILAE | 2  | 13  | S2_3876621   | S2_4277587   | 4.4  | 4.3  | -0.39  | -0.23 | 12.5  | 13.5  |
| 21LY | AILAE | 2  | 86  | S2_40420633  | S2_40560337  | 6.9  | 7.2  | -0.56  | 0.05  | 84.5  | 86.5  |
| 21LY | AILAE | 6  | 72  | S6_98444313  | S6_100494561 | 7.2  | 7.4  | -0.56  | -0.01 | 71.5  | 73.5  |
| 21XT | PH    | 1  | 47  | S1_11671250  | S1_12716397  | 4.7  | 0.8  | -4.34  | 1.05  | 45.5  | 47.5  |
| 21XT | PH    | 1  | 141 | S1_110002889 | S1_143444026 | 72.4 | 24.3 | -21.76 | 0.65  | 140.5 | 141.5 |
| 21XT | PH    | 1  | 164 | S1_118075679 | S1_115182187 | 55.8 | 15.4 | 17.10  | 0.26  | 163.5 | 164.5 |
| 21XT | PH    | 1  | 289 | S1_269329879 | S1_270329585 | 16.9 | 3.3  | -8.20  | 1.13  | 288.5 | 289.5 |
| 21XT | PH    | 2  | 190 | S2_194070269 | S2_194953435 | 20.9 | 4.2  | -9.24  | 3.24  | 188.5 | 191.5 |
| 21XT | PH    | 3  | 142 | S3_202756748 | S3_204515987 | 13.5 | 2.7  | 7.37   | 1.73  | 141.5 | 142.5 |
| 21XT | PH    | 4  | 14  | S4_5651041   | S4_6039804   | 4.1  | 0.7  | 4.02   | 0.55  | 11.5  | 17.5  |
| 21XT | PH    | 4  | 49  | S4_24524787  | S4_25776067  | 5.8  | 1.0  | -4.81  | -0.62 | 47.5  | 50.5  |
| 21XT | PH    | 5  | 0   | S5_191242515 | S5_189324793 | 12.3 | 2.2  | -6.86  | 2.49  | 0     | 0.5   |
| 21XT | PH    | 6  | 69  | S6_96214388  | S6_99027644  | 14.3 | 2.8  | -8.08  | 1.01  | 68.5  | 69.5  |
| 21XT | PH    | 7  | 53  | S7_67238775  | S7_53422226  | 13.3 | 2.6  | 7.61   | 0.54  | 52.5  | 53.5  |
| 21XT | PH    | 7  | 57  | S7_35657556  | S7_103970149 | 32.2 | 7.2  | -13.47 | 1.82  | 56.5  | 57.5  |
| 21XT | PH    | 8  | 6   | S8_2200273   | S8_2437582   | 6.3  | 1.1  | 4.66   | 2.31  | 5.5   | 6.5   |
| 21XT | PH    | 8  | 124 | S8_136858916 | S8_155239245 | 10.5 | 1.9  | -1.89  | 9.31  | 123.5 | 124.5 |
| 21XT | PH    | 8  | 188 | S8_179303074 | S8_181044202 | 5.6  | 1.0  | 1.05   | 6.79  | 186.5 | 188   |
| 21XT | EH    | 1  | 157 | S1_112127208 | S1_113123793 | 18.0 | 8.6  | 5.38   | 0.59  | 156.5 | 157.5 |
| 21XT | EH    | 1  | 167 | S1_156170224 | S1_156411308 | 26.5 | 13.2 | -6.95  | -0.48 | 166.5 | 167.5 |
| 21XT | EH    | 2  | 233 | S2_223195826 | S2_223464405 | 12.6 | 5.5  | -4.40  | 1.81  | 232.5 | 234.5 |
| 21XT | EH    | 2  | 277 | S2_242359991 | S2_243177289 | 7.8  | 3.4  | 3.42   | 1.42  | 275.5 | 278   |
| 21XT | EH    | 3  | 47  | S3_16736078  | S3_16972714  | 7.5  | 3.3  | -3.52  | 1.09  | 45.5  | 48.5  |
| 21XT | EH    | 3  | 84  | S3_145600894 | S3_139135638 | 18.6 | 8.8  | 5.79   | -0.47 | 83.5  | 84.5  |

|      |       |    |     |               |               |      |      |        |       |       |       |
|------|-------|----|-----|---------------|---------------|------|------|--------|-------|-------|-------|
| 21XT | EH    | 5  | 3   | S5_179758728  | S5_170980192  | 13.5 | 6.0  | -4.87  | 0.44  | 1.5   | 4.5   |
| 21XT | EH    | 8  | 75  | S8_56604393   | S8_52875891   | 10.8 | 4.7  | -4.35  | -0.29 | 74.5  | 76.5  |
| 21XT | EH    | 9  | 30  | S9_12500206   | S9_12698428   | 6.6  | 2.8  | 3.32   | -0.70 | 29.5  | 31.5  |
| 21XT | PHAE  | 1  | 141 | S1_110002889  | S1_143444026  | 13.2 | 6.7  | -6.69  | 0.53  | 140.5 | 141.5 |
| 21XT | PHAE  | 1  | 286 | S1_268575537  | S1_268584138  | 14.4 | 7.2  | 7.07   | 2.41  | 285.5 | 286.5 |
| 21XT | PHAE  | 1  | 289 | S1_269329879  | S1_270329585  | 38.5 | 23.8 | -12.84 | 1.78  | 288.5 | 289.5 |
| 21XT | PHAE  | 2  | 180 | S2_188907014  | S2_190762998  | 13.3 | 6.6  | -6.97  | 1.43  | 179.5 | 180.5 |
| 21XT | PHAE  | 7  | 105 | S7_167277540  | S7_170257603  | 6.5  | 3.1  | 4.90   | -0.82 | 104.5 | 106.5 |
| 21XT | PHAE  | 8  | 122 | S8_136858916  | S8_155239245  | 4.6  | 2.2  | 1.07   | 5.34  | 120.5 | 123.5 |
| 21XT | PHAE  | 10 | 26  | S10_4281712   | S10_4476300   | 4.2  | 2.1  | -4.06  | -0.66 | 23.5  | 27.5  |
| 21XT | TL    | 1  | 207 | S1_197842519  | S1_198043688  | 5.6  | 3.3  | -1.01  | -0.23 | 205.5 | 207.5 |
| 21XT | TL    | 1  | 269 | S1_257231788  | S1_257870704  | 8.0  | 5.1  | 1.34   | -0.11 | 267.5 | 270.5 |
| 21XT | TL    | 1  | 290 | S1_273002635  | S1_273836450  | 12.5 | 8.0  | -1.55  | 0.21  | 289.5 | 291.5 |
| 21XT | TL    | 2  | 248 | S2_233403203  | S2_233476723  | 8.7  | 5.4  | -1.29  | -0.05 | 246.5 | 248.5 |
| 21XT | TL    | 2  | 274 | S2_241126960  | S2_241790578  | 8.9  | 5.5  | -1.31  | -0.32 | 271.5 | 274.5 |
| 21XT | TL    | 3  | 96  | S3_157561325  | S3_158611286  | 4.5  | 2.7  | -0.12  | 1.34  | 95.5  | 96.5  |
| 21XT | TL    | 3  | 119 | S3_181430700  | S3_183054245  | 8.6  | 5.5  | 1.37   | 0.23  | 118.5 | 120.5 |
| 21XT | TL    | 6  | 115 | S6_151999143  | S6_152608758  | 8.2  | 5.3  | 1.35   | 0.19  | 112.5 | 115.5 |
| 21XT | TL    | 7  | 47  | S7_13644694   | S7_15921898   | 16.9 | 11.7 | -2.00  | -0.23 | 46.5  | 47.5  |
| 21XT | TL    | 8  | 128 | S8_157390197  | S8_162606948  | 8.2  | 5.1  | 1.29   | 0.09  | 126.5 | 128.5 |
| 21XT | AENN  | 1  | 227 | S1_215648855  | S1_216312177  | 24.6 | 5.7  | 0.24   | -0.03 | 226.5 | 227.5 |
| 21XT | AENN  | 1  | 231 | S1_219091374  | S1_219345086  | 16.5 | 3.7  | -0.20  | 0.01  | 230.5 | 231.5 |
| 21XT | AENN  | 1  | 362 | S1_304940162  | S1_305107918  | 4.5  | 0.9  | -0.10  | -0.02 | 360.5 | 363   |
| 21XT | AENN  | 2  | 156 | S2_173967687  | S2_174134822  | 5.3  | 1.1  | -0.11  | 0.00  | 154.5 | 156.5 |
| 21XT | AENN  | 2  | 278 | S2_243537180  | S2_244109746  | 13.9 | 3.0  | -0.18  | -0.04 | 277.5 | 278   |
| 21XT | AENN  | 3  | 48  | S3_16736078   | S3_16972714   | 15.5 | 3.3  | -0.19  | -0.02 | 46.5  | 48.5  |
| 21XT | AENN  | 3  | 98  | S3_158989326  | S3_160473752  | 15.2 | 3.4  | 0.19   | 0.04  | 97.5  | 98.5  |
| 21XT | AENN  | 3  | 150 | S3_207962098  | S3_208325684  | 11.2 | 2.3  | 0.16   | 0.03  | 149.5 | 151.5 |
| 21XT | AENN  | 6  | 35  | S6_76077187   | S6_83127386   | 47.8 | 13.9 | -0.40  | 0.02  | 34.5  | 35.5  |
| 21XT | AENN  | 6  | 46  | S6_73928215   | S6_82194026   | 67.0 | 23.9 | 0.54   | 0.01  | 45.5  | 46.5  |
| 21XT | AENN  | 8  | 54  | S8_17292863   | S8_18462606   | 6.9  | 1.4  | 0.12   | -0.06 | 51.5  | 55.5  |
| 21XT | AENN  | 9  | 79  | S9_145088102  | S9_151217105  | 9.3  | 1.9  | -0.15  | -0.04 | 77.5  | 79.5  |
| 21XT | AENN  | 10 | 100 | S10_140832404 | S10_143210614 | 6.6  | 1.3  | -0.12  | 0.04  | 99.5  | 102.5 |
| 21XT | AILAE | 1  | 141 | S1_110002889  | S1_143444026  | 4.2  | 3.2  | -0.35  | 0.12  | 140.5 | 141.5 |
| 21XT | AILAE | 1  | 207 | S1_197842519  | S1_198043688  | 6.3  | 4.8  | -0.46  | -0.02 | 205.5 | 207.5 |
| 21XT | AILAE | 1  | 273 | S1_257980045  | S1_258441675  | 8.9  | 7.0  | -0.56  | 0.17  | 272.5 | 274.5 |
| 21XT | AILAE | 2  | 147 | S2_157225575  | S2_157225727  | 5.0  | 3.8  | -0.40  | 0.15  | 146.5 | 149.5 |
| 21XT | AILAE | 2  | 188 | S2_193721872  | S2_193814824  | 6.6  | 5.0  | -0.46  | 0.19  | 185.5 | 188.5 |
| 21XT | AILAE | 3  | 108 | S3_171642559  | S3_171710537  | 7.6  | 6.0  | -0.47  | 0.22  | 106.5 | 109.5 |
| 21XT | AILAE | 6  | 60  | S6_93872487   | S6_94245221   | 17.6 | 15.2 | -0.85  | 0.08  | 59.5  | 61.5  |
| 21XT | AILAE | 6  | 114 | S6_151999143  | S6_152608758  | 9.4  | 7.5  | 0.59   | 0.13  | 112.5 | 115.5 |
| 21XT | AILAE | 9  | 13  | S9_6587462    | S9_9205824    | 9.3  | 7.8  | -0.56  | 0.09  | 11.5  | 14.5  |
| 21XX | PH    | 1  | 129 | S1_88452861   | S1_89644712   | 7.2  | 3.6  | 4.48   | 1.33  | 128.5 | 129.5 |
| 21XX | PH    | 1  | 179 | S1_174128698  | S1_180370264  | 22.0 | 12.1 | -8.63  | 2.39  | 178.5 | 179.5 |

|      |      |    |     |              |              |      |      |       |       |       |       |
|------|------|----|-----|--------------|--------------|------|------|-------|-------|-------|-------|
| 21XX | PH   | 1  | 318 | S1_292331671 | S1_292615519 | 11.5 | 5.9  | -6.23 | -0.18 | 316.5 | 319.5 |
| 21XX | PH   | 2  | 180 | S2_188907014 | S2_190762998 | 8.8  | 4.4  | -5.33 | 0.48  | 179.5 | 181.5 |
| 21XX | PH   | 3  | 78  | S3_129403674 | S3_130034086 | 6.7  | 3.4  | 4.54  | 0.10  | 77.5  | 78.5  |
| 21XX | PH   | 3  | 155 | S3_212187491 | S3_213465208 | 6.3  | 3.1  | 4.32  | 0.71  | 154.5 | 157.5 |
| 21XX | PH   | 4  | 57  | S4_32408665  | S4_36804605  | 7.9  | 3.9  | -4.76 | 1.62  | 56.5  | 58.5  |
| 21XX | PH   | 6  | 72  | S6_98444313  | S6_100494561 | 16.0 | 8.4  | -7.41 | 0.49  | 71.5  | 73.5  |
| 21XX | PH   | 6  | 94  | S6_133193926 | S6_134042655 | 14.4 | 7.7  | 7.08  | -0.47 | 93.5  | 94.5  |
| 21XX | PH   | 6  | 133 | S6_158799634 | S6_159593586 | 4.5  | 2.3  | 3.69  | 0.24  | 130.5 | 135.5 |
| 21XX | PH   | 8  | 0   | S8_245739    | S8_625088    | 4.2  | 2.0  | 3.61  | 1.19  | 0     | 0.5   |
| 21XX | PH   | 9  | 49  | S9_68994370  | S9_91946183  | 6.0  | 3.0  | -4.38 | -0.55 | 48.5  | 49.5  |
| 21XX | EH   | 1  | 47  | S1_11671250  | S1_12716397  | 5.2  | 3.9  | -2.11 | 0.32  | 44.5  | 47.5  |
| 21XX | EH   | 1  | 179 | S1_174128698 | S1_180370264 | 7.2  | 5.4  | -2.34 | 0.91  | 178.5 | 181.5 |
| 21XX | EH   | 2  | 190 | S2_194070269 | S2_194953435 | 6.5  | 4.9  | -2.25 | 0.63  | 188.5 | 191.5 |
| 21XX | EH   | 2  | 277 | S2_242359991 | S2_243177289 | 16.3 | 12.9 | 3.48  | 1.52  | 276.5 | 278   |
| 21XX | EH   | 3  | 78  | S3_129403674 | S3_130034086 | 8.3  | 6.4  | 2.57  | -0.46 | 77.5  | 78.5  |
| 21XX | EH   | 5  | 0   | S5_191242515 | S5_189324793 | 5.9  | 4.3  | -2.07 | 0.88  | 0     | 0.5   |
| 21XX | EH   | 5  | 70  | S5_1397619   | S5_120544    | 6.1  | 4.6  | -2.31 | 0.10  | 68.5  | 70.5  |
| 21XX | EH   | 6  | 52  | S6_88267885  | S6_89083642  | 7.4  | 5.4  | -2.43 | 0.39  | 51.5  | 52.5  |
| 21XX | EH   | 6  | 99  | S6_138542031 | S6_139900816 | 4.2  | 3.1  | 1.85  | -0.07 | 98.5  | 99.5  |
| 21XX | EH   | 8  | 102 | S8_109465772 | S8_110495388 | 4.3  | 3.2  | -1.75 | -0.53 | 101.5 | 102.5 |
| 21XX | EH   | 10 | 6   | S10_1562457  | S10_2048136  | 5.1  | 4.0  | 2.03  | -0.29 | 3.5   | 7.5   |
| 21XX | PHAE | 1  | 110 | S1_71985240  | S1_72906175  | 4.9  | 3.6  | -0.17 | 4.99  | 108.5 | 111.5 |
| 21XX | PHAE | 1  | 317 | S1_291664004 | S1_292331671 | 10.4 | 8.3  | -5.39 | -0.61 | 315.5 | 318.5 |
| 21XX | PHAE | 2  | 274 | S2_241126960 | S2_241790578 | 8.4  | 6.5  | -4.53 | 1.31  | 272.5 | 274.5 |
| 21XX | PHAE | 3  | 74  | S3_127113244 | S3_128626658 | 4.1  | 3.1  | 3.06  | 1.04  | 73.5  | 75.5  |
| 21XX | PHAE | 3  | 193 | S3_230739332 | S3_231276686 | 5.1  | 4.2  | 1.06  | 5.01  | 191.5 | 193.5 |
| 21XX | PHAE | 4  | 76  | S4_110627655 | S4_133437637 | 7.8  | 6.0  | -4.47 | 0.15  | 74.5  | 77.5  |
| 21XX | PHAE | 6  | 72  | S6_98444313  | S6_100494561 | 5.3  | 4.0  | -3.70 | 0.32  | 71.5  | 74.5  |
| 21XX | PHAE | 6  | 114 | S6_151999143 | S6_152608758 | 11.8 | 9.6  | 5.73  | 1.36  | 112.5 | 115.5 |
| 21XX | TL   | 1  | 41  | S1_10852905  | S1_11128611  | 5.7  | 4.7  | -1.24 | 0.56  | 38.5  | 42.5  |
| 21XX | TL   | 1  | 318 | S1_292331671 | S1_292615519 | 4.7  | 3.7  | -1.16 | 0.27  | 316.5 | 320.5 |
| 21XX | TL   | 2  | 108 | S2_57300855  | S2_57733024  | 5.0  | 3.9  | 1.12  | 0.43  | 107.5 | 109.5 |
| 21XX | TL   | 2  | 271 | S2_241126960 | S2_241790578 | 4.7  | 3.8  | -1.14 | -0.12 | 269.5 | 274.5 |
| 21XX | TL   | 3  | 121 | S3_183054245 | S3_184601636 | 6.4  | 5.2  | 1.38  | 0.02  | 119.5 | 122.5 |
| 21XX | TL   | 4  | 77  | S4_133437637 | S4_133642844 | 6.5  | 5.1  | -1.39 | -0.17 | 74.5  | 77.5  |
| 21XX | TL   | 6  | 95  | S6_134042655 | S6_136571957 | 11.4 | 9.3  | 1.85  | 0.00  | 93.5  | 96.5  |
| 21XX | TL   | 7  | 47  | S7_13644694  | S7_15921898  | 13.4 | 11.7 | -2.10 | -0.19 | 46.5  | 47.5  |
| 21XX | TL   | 8  | 173 | S8_176950316 | S8_177160597 | 6.3  | 5.3  | 1.45  | 0.33  | 169.5 | 175.5 |

Notes: PH, plant height; EH, ear height; PHAE, plant height above-ear; TL, tassel length; AENN, above-ear node number; AILAE, average internode length above-ear. Env., environment; Chr. chromosome; Pos., position; PVE, phenotypic variance explained the QTL; Add, additive effect; Dom, dominance effect; Add., additive effect; Dom. dominance effect; CI., confidence interval; Negative and positive values in add. and dom. indicates the effects are from the parent Zheng58 and PH6WC, respectively.



**Table S5** Epistatic QTL identified for the traits of BLUE values in the IMF<sub>2</sub> population

| Trait | Chr. i | Pos. i | Marker interval i           | Chr. j | Pos. j | Marker interval j             | LOD | PVE(%) | Add i | Add j | Dom i | Dom j | Add by<br>Add | Add by<br>Dom | Dom by<br>Add | Dom by<br>Dom | Major<br>effect |
|-------|--------|--------|-----------------------------|--------|--------|-------------------------------|-----|--------|-------|-------|-------|-------|---------------|---------------|---------------|---------------|-----------------|
| PH    | 1      | 45     | S1_11671250 - S1_12716397   | 9      | 20     | S9_9724404 - S9_10722507      | 6.2 | 9.3    | -4.33 | 2.23  | 1.09  | 0.50  | -5.94         | 0.89          | -1.69         | -0.59         | aa              |
| PH    | 1      | 190    | S1_184630453 - S1_185850186 | 7      | 130    | S7_176443705 - S7_177637932   | 5.0 | 5.1    | 0.65  | 1.44  | 6.04  | 3.97  | 0.99          | -2.38         | -0.83         | -10.77        | dd              |
| PH    | 1      | 320    | S1_292331671 - S1_292615519 | 1      | 360    | S1_304587897 - S1_304932473   | 5.0 | 4.9    | -1.26 | -0.95 | -2.68 | -4.41 | -1.29         | 0.39          | 1.42          | 9.75          | dd              |
| PH    | 2      | 0      | S2_41033 - S2_1083914       | 3      | 85     | S3_145600894 - S3_139135638   | 5.9 | 5.0    | -4.43 | -1.44 | 2.30  | 1.37  | 0.51          | 5.53          | 4.43          | -2.91         | ad              |
| PH    | 2      | 50     | S2_13574260 - S2_14088283   | 5      | 30     | S5_13546996 - S5_11683352     | 6.5 | 5.7    | 3.59  | -1.18 | -2.42 | -0.31 | -0.62         | -6.19         | 4.24          | 4.75          | ad              |
| PH    | 2      | 260    | S2_239274384 - S2_239370993 | 10     | 105    | S10_140832404 - S10_143210614 | 5.8 | 5.7    | -1.58 | 0.74  | -5.44 | -3.83 | 1.66          | 3.48          | -3.52         | 8.04          | dd              |
| PH    | 3      | 5      | S3_3982403 - S3_4175085     | 6      | 145    | S6_162432992 - S6_162563453   | 5.4 | 3.7    | 1.91  | 4.20  | 1.30  | 0.87  | -2.56         | -2.32         | -5.68         | -1.59         | ad              |
| PH    | 3      | 10     | S3_4595954 - S3_5495815     | 9      | 0      | S9_3990742 - S9_4441847       | 5.3 | 4.3    | -0.47 | 3.03  | 3.53  | 2.95  | 0.53          | 1.76          | -5.97         | -5.16         | ad              |
| PH    | 3      | 15     | S3_5809538 - S3_7393597     | 5      | 25     | S5_19952245 - S5_13744674     | 6.1 | 6.3    | 1.32  | 4.37  | 1.67  | 1.65  | -1.78         | -1.66         | -7.23         | 2.10          | ad              |
| PH    | 3      | 90     | S3_150288145 - S3_152243848 | 7      | 50     | S7_25644859 - S7_27939165     | 5.3 | 3.5    | 1.82  | -1.05 | -0.79 | 0.04  | -3.72         | -3.29         | 2.33          | 0.02          | aa              |
| EH    | 1      | 25     | S1_4908782 - S1_6322458     | 9      | 10     | S9_5071229 - S9_5606263       | 5.2 | 7.2    | -0.59 | 2.18  | 1.74  | 0.95  | -0.98         | 0.78          | -4.61         | -1.22         | ad              |
| EH    | 1      | 45     | S1_11671250 - S1_12716397   | 10     | 0      | S10_1102942 - S10_1238544     | 5.9 | 8.8    | -2.19 | 3.26  | 1.30  | 0.34  | -1.73         | 2.10          | -3.61         | -2.52         | ad              |
| EH    | 2      | 25     | S2_6564039 - S2_6868941     | 8      | 80     | S8_75939202 - S8_77058745     | 5.4 | 7.0    | 0.53  | -1.28 | 0.17  | 0.89  | -3.08         | -0.79         | -0.04         | -0.74         | aa              |
| EH    | 6      | 10     | S6_3646695 - S6_3830350     | 10     | 105    | S10_140832404 - S10_143210614 | 5.0 | 6.7    | 0.43  | 1.28  | -1.61 | -0.63 | 2.70          | -0.20         | -2.76         | 1.29          | ad              |
| EH    | 6      | 25     | S6_28516337 - S6_30754790   | 8      | 85     | S8_89837142 - S8_89844495     | 5.8 | 6.9    | 0.77  | -1.97 | -0.43 | -0.41 | -1.33         | -2.82         | 2.59          | 1.05          | ad              |
| PHAE  | 1      | 0      | S1_132093 - S1_2109865      | 10     | 80     | S10_133899128 - S10_134615174 | 5.4 | 3.5    | 1.59  | -1.65 | 0.89  | 0.47  | 0.99          | -3.69         | 4.93          | 0.36          | ad              |
| PHAE  | 1      | 5      | S1_2897280 - S1_3036249     | 1      | 345    | S1_300788992 - S1_301043158   | 5.4 | 4.0    | -0.18 | 1.04  | 0.36  | 0.68  | 3.27          | -1.38         | -3.97         | -0.10         | ad              |
| PHAE  | 1      | 65     | S1_21287388 - S1_21980824   | 8      | 145    | S8_171482717 - S8_171837631   | 5.7 | 3.8    | -0.71 | 1.62  | 0.04  | -0.98 | 3.61          | 2.09          | -2.71         | 1.31          | aa              |
| PHAE  | 1      | 80     | S1_30087860 - S1_30541220   | 3      | 105    | S3_169453685 - S3_170032493   | 5.8 | 3.8    | -2.42 | 1.27  | 1.83  | 3.97  | 2.08          | 5.36          | -2.84         | -3.87         | ad              |
| PHAE  | 1      | 165    | S1_113772604 - S1_152424407 | 5      | 40     | S5_10258023 - S5_8850189      | 5.6 | 3.5    | -0.70 | -2.10 | 1.83  | 2.37  | 0.72          | 2.15          | 4.54          | -4.81         | dd              |
| PHAE  | 1      | 205    | S1_197314960 - S1_197499396 | 2      | 200    | S2_200783940 - S2_201609947   | 5.2 | 3.6    | -1.12 | -0.91 | 2.83  | 3.29  | 2.46          | -0.05         | 2.82          | -5.37         | dd              |
| PHAE  | 1      | 245    | S1_230038981 - S1_230531645 | 6      | 20     | S6_9902679 - S6_16653812      | 5.8 | 3.8    | 0.75  | 0.74  | 1.18  | 0.04  | 4.52          | -0.60         | -0.81         | -1.62         | aa              |
| PHAE  | 2      | 50     | S2_13574260 - S2_14088283   | 5      | 30     | S5_13546996 - S5_11683352     | 5.1 | 4.4    | 1.61  | -1.77 | -0.46 | -1.06 | -1.91         | -3.87         | 3.88          | 3.81          | ad              |
| PHAE  | 2      | 55     | S2_15450819 - S2_15740493   | 7      | 0      | S7_730311 - S7_1414806        | 6.0 | 4.3    | 1.45  | -1.00 | 0.68  | -0.44 | -4.14         | -1.32         | 0.75          | 2.50          | aa              |
| PHAE  | 2      | 70     | S2_24772111 - S2_24963216   | 9      | 30     | S9_12500206 - S9_12698428     | 5.6 | 3.8    | -0.87 | -2.26 | 1.14  | -1.05 | -2.13         | 0.74          | 5.45          | 0.43          | ad              |
| PHAE  | 2      | 275    | S2_242050148 - S2_242359991 | 8      | 25     | S8_6154100 - S8_6299217       | 5.8 | 3.7    | -0.78 | 1.63  | 2.35  | 1.75  | -1.99         | 2.15          | -3.69         | -5.50         | dd              |
| PHAE  | 3      | 125    | S3_186922295 - S3_187679512 | 3      | 150    | S3_207962098 - S3_208325684   | 5.4 | 3.4    | 1.48  | -0.39 | 2.12  | 2.56  | -2.47         | -1.05         | -0.59         | -6.56         | dd              |
| PHAE  | 5      | 70     | S5_1397619 - S5_120544      | 7      | 130    | S7_176443705 - S7_177637932   | 5.3 | 3.9    | 0.87  | -1.73 | 0.12  | 0.04  | 4.43          | -0.70         | 3.67          | -0.65         | aa              |
| PHAE  | 6      | 25     | S6_28516337 - S6_30754790   | 6      | 140    | S6_160413362 - S6_161163501   | 5.2 | 3.5    | -0.47 | -0.20 | -2.56 | -1.02 | 3.21          | 1.74          | -0.71         | 4.08          | dd              |

|      |    |     |                             |    |     |                               |     |      |       |       |       |       |       |       |       |        |    |
|------|----|-----|-----------------------------|----|-----|-------------------------------|-----|------|-------|-------|-------|-------|-------|-------|-------|--------|----|
| PHAE | 6  | 130 | S6_158315087 - S6_158532450 | 10 | 15  | S10_2372764 - S10_2754874     | 5.4 | 3.6  | -0.09 | -1.61 | 4.05  | 1.91  | 1.88  | -0.26 | 2.70  | -6.02  | dd |
| PHAE | 7  | 50  | S7_25644859 - S7_27939165   | 9  | 100 | S9_154838789 - S9_156832816   | 5.0 | 3.7  | -0.72 | -1.88 | 2.77  | 3.52  | 2.79  | 0.39  | 4.04  | -3.42  | ad |
| PHAE | 7  | 150 | S7_180747932 - S7_181089779 | 10 | 0   | S10_1102942 - S10_1238544     | 6.8 | 4.1  | 0.45  | -0.33 | -3.32 | -1.71 | -4.08 | -0.60 | -1.70 | 3.98   | aa |
| PHAE | 8  | 120 | S8_132313712 - S8_134646229 | 10 | 15  | S10_2372764 - S10_2754874     | 6.8 | 4.3  | 1.71  | -2.90 | -0.17 | -0.47 | 2.35  | -2.46 | 4.91  | -1.02  | ad |
| PHAE | 9  | 65  | S9_114298575 - S9_142292875 | 10 | 120 | S10_145972304 - S10_147054287 | 5.6 | 6.6  | -1.56 | 1.34  | 4.60  | 5.53  | -1.35 | -0.43 | -2.18 | -10.56 | dd |
| TL   | 1  | 35  | S1_9997005 - S1_10258020    | 4  | 85  | S4_149228365 - S4_151063954   | 5.5 | 3.6  | 0.45  | -0.74 | -0.11 | 0.27  | -0.38 | -0.89 | 1.34  | -0.22  | ad |
| TL   | 1  | 185 | S1_180292075 - S1_181340572 | 5  | 40  | S5_10258023 - S5_8850189      | 5.0 | 4.0  | 0.37  | 0.17  | 1.35  | 1.23  | -0.56 | -0.45 | -0.06 | -2.06  | dd |
| TL   | 1  | 250 | S1_234268367 - S1_234388480 | 2  | 55  | S2_15450819 - S2_15740493     | 5.6 | 3.9  | 0.58  | -0.92 | -0.93 | -0.95 | -0.53 | -0.83 | 1.32  | 1.36   | dd |
| TL   | 1  | 325 | S1_293920109 - S1_294248361 | 3  | 110 | S3_172731597 - S3_178337993   | 5.2 | 4.0  | -0.09 | 0.12  | 1.10  | 1.09  | -0.82 | -0.14 | -0.04 | -1.72  | dd |
| TL   | 1  | 345 | S1_300788992 - S1_301043158 | 9  | 30  | S9_12500206 - S9_12698428     | 5.0 | 3.9  | -0.17 | -0.12 | -0.87 | -1.15 | -0.05 | -0.13 | 0.83  | 2.00   | dd |
| TL   | 2  | 55  | S2_15450819 - S2_15740493   | 4  | 30  | S4_11652202 - S4_11762566     | 5.3 | 4.3  | -0.71 | -0.75 | -0.88 | -0.52 | 1.20  | 0.58  | 0.58  | 0.88   | aa |
| TL   | 2  | 65  | S2_20704326 - S2_20765552   | 7  | 145 | S7_178653254 - S7_179354212   | 6.0 | 4.5  | 0.13  | 0.89  | 0.11  | 0.22  | 0.14  | -0.33 | -1.79 | 0.11   | ad |
| TL   | 3  | 0   | S3_3087150 - S3_3103038     | 10 | 100 | S10_140832404 - S10_143210614 | 5.2 | 4.1  | -0.59 | -0.74 | -0.07 | -0.43 | 0.80  | 0.08  | 1.57  | 0.08   | ad |
| TL   | 4  | 30  | S4_11652202 - S4_11762566   | 8  | 180 | S8_177983965 - S8_178359010   | 9.6 | 6.8  | -0.16 | 1.31  | 1.11  | 0.99  | -1.03 | 0.07  | -1.54 | -1.71  | dd |
| TL   | 4  | 45  | S4_22850445 - S4_24524787   | 10 | 60  | S10_56837781 - S10_58446849   | 5.1 | 4.9  | -0.41 | -0.64 | 1.05  | 0.39  | 0.69  | 0.56  | 0.66  | -1.62  | dd |
| TL   | 5  | 10  | S5_170980192 - S5_43800877  | 8  | 50  | S8_15101811 - S8_17292863     | 5.5 | 5.1  | -0.61 | 0.67  | -0.94 | -0.89 | -0.22 | 1.69  | -0.79 | 1.42   | ad |
| TL   | 6  | 130 | S6_158315087 - S6_158532450 | 10 | 75  | S10_127954750 - S10_129535696 | 5.6 | 3.7  | 0.56  | -0.50 | -0.24 | -0.43 | -0.26 | -1.09 | 0.83  | 1.00   | ad |
| TL   | 7  | 125 | S7_172900931 - S7_176067682 | 10 | 105 | S10_140832404 - S10_143210614 | 6.3 | 5.7  | 0.94  | -0.37 | 0.21  | -0.51 | 0.12  | -1.90 | 0.98  | -0.03  | ad |
| TL   | 8  | 10  | S8_3069086 - S8_3220600     | 9  | 95  | S9_154838789 - S9_156832816   | 6.6 | 6.3  | 0.34  | 1.33  | 0.48  | 0.39  | -1.51 | -0.13 | -1.09 | 0.22   | aa |
| TL   | 9  | 5   | S9_4441314 - S9_5071229     | 9  | 110 | S9_157944455 - S9_158039498   | 5.2 | 4.8  | -0.72 | 0.28  | -0.43 | 0.26  | 0.80  | 1.37  | 0.59  | 0.31   | ad |
| TL   | 10 | 50  | S10_14793404 - S10_15031133 | 10 | 90  | S10_138350431 - S10_138511994 | 5.1 | 3.8  | -0.89 | 0.86  | -0.49 | 0.04  | -0.25 | 0.98  | -1.63 | 0.16   | ad |
| AENN | 1  | 0   | S1_132093 - S1_2109865      | 1  | 50  | S1_13761553 - S1_13908602     | 5.3 | 4.1  | -0.05 | -0.01 | 0.14  | 0.11  | 0.08  | 0.04  | 0.07  | -0.23  | aa |
| AENN | 1  | 50  | S1_13761553 - S1_13908602   | 3  | 80  | S3_135811818 - S3_135985887   | 7.2 | 5.5  | 0.01  | 0.00  | -0.14 | -0.13 | 0.10  | 0.01  | -0.03 | 0.26   | dd |
| AENN | 1  | 75  | S1_25636570 - S1_26614707   | 7  | 130 | S7_176443705 - S7_177637932   | 6.5 | 6.8  | -0.05 | -0.12 | 0.04  | 0.07  | -0.02 | 0.15  | 0.19  | -0.15  | ad |
| AENN | 1  | 140 | S1_109846948 - S1_109867103 | 8  | 90  | S8_98054940 - S8_101866995    | 5.7 | 4.3  | -0.10 | 0.03  | 0.06  | 0.04  | -0.06 | 0.18  | -0.06 | -0.04  | ad |
| AENN | 1  | 270 | S1_257231788 - S1_257870704 | 5  | 75  | S5_1356035 - S5_222474229     | 5.5 | 4.3  | 0.01  | 0.08  | -0.14 | -0.12 | 0.00  | 0.00  | -0.15 | 0.21   | dd |
| AENN | 1  | 345 | S1_300788992 - S1_301043158 | 9  | 50  | S9_91643493 - S9_95189235     | 7.2 | 6.1  | -0.05 | 0.01  | -0.12 | -0.10 | -0.10 | 0.06  | -0.10 | 0.25   | dd |
| AENN | 2  | 75  | S2_29361057 - S2_29829813   | 10 | 110 | S10_143572593 - S10_143794647 | 7.4 | 6.0  | -0.09 | 0.02  | 0.07  | 0.13  | 0.06  | 0.19  | -0.07 | -0.15  | ad |
| AENN | 2  | 185 | S2_190810969 - S2_191462633 | 8  | 85  | S8_89837142 - S8_89844495     | 5.2 | 3.8  | 0.04  | -0.02 | -0.04 | -0.06 | 0.11  | -0.08 | 0.02  | 0.15   | dd |
| AENN | 3  | 125 | S3_186922295 - S3_187679512 | 9  | 20  | S9_9724404 - S9_10722507      | 5.4 | 4.1  | 0.01  | -0.07 | 0.03  | 0.05  | -0.07 | -0.06 | 0.15  | -0.12  | ad |
| AENN | 5  | 30  | S5_13546996 - S5_11683352   | 5  | 50  | S5_6421695 - S5_5978052       | 6.9 | 5.2  | -0.10 | 0.10  | -0.09 | -0.08 | -0.22 | 0.12  | -0.15 | 0.00   | aa |
| AENN | 7  | 5   | S7_1414806 - S7_3080163     | 8  | 0   | S8_245739 - S8_625088         | 5.7 | 4.5  | 0.00  | -0.02 | 0.09  | 0.05  | -0.11 | 0.02  | 0.04  | -0.11  | dd |
| AENN | 8  | 50  | S8_15101811 - S8_17292863   | 8  | 55  | S8_18462606 - S8_18951887     | 5.0 | 14.7 | 0.18  | 0.01  | 0.06  | 0.08  | 0.23  | -0.23 | -0.03 | 0.03   | aa |

|       |   |     |                             |    |     |                               |     |     |       |       |       |       |       |       |       |       |    |
|-------|---|-----|-----------------------------|----|-----|-------------------------------|-----|-----|-------|-------|-------|-------|-------|-------|-------|-------|----|
| AILAE | 1 | 125 | S1_85173860 - S1_84249804   | 7  | 40  | S7_9193825 - S7_9619402       | 5.9 | 6.4 | 0.22  | 0.03  | 0.11  | 0.19  | -0.13 | -0.52 | -0.32 | -0.03 | ad |
| AILAE | 1 | 215 | S1_203118803 - S1_204753671 | 10 | 105 | S10_140832404 - S10_143210614 | 5.1 | 5.0 | -0.25 | -0.12 | -0.17 | -0.27 | 0.44  | 0.35  | 0.00  | 0.34  | aa |
| AILAE | 2 | 15  | S2_4480978 - S2_4661172     | 7  | 140 | S7_177749949 - S7_178153031   | 5.8 | 6.0 | 0.30  | 0.12  | -0.24 | -0.27 | 0.02  | -0.52 | -0.39 | 0.16  | ad |
| AILAE | 2 | 25  | S2_6564039 - S2_6868941     | 10 | 20  | S10_3671242 - S10_4264931     | 5.2 | 5.4 | 0.13  | -0.18 | -0.15 | -0.37 | 0.30  | -0.21 | 0.21  | 0.50  | dd |
| AILAE | 3 | 35  | S3_9812175 - S3_10947297    | 3  | 195 | S3_232292314 - S3_232638036   | 5.3 | 4.7 | -0.11 | 0.24  | -0.19 | -0.06 | -0.16 | 0.20  | -0.42 | 0.45  | dd |
| AILAE | 3 | 120 | S3_181430700 - S3_183054245 | 7  | 20  | S7_1414806 - S7_3080163       | 5.1 | 5.2 | -0.13 | 0.21  | 0.20  | 0.13  | 0.07  | 0.19  | -0.55 | -0.08 | ad |
| AILAE | 6 | 10  | S6_3646695 - S6_3830350     | 9  | 35  | S9_15133455 - S9_21566415     | 6.3 | 5.7 | -0.13 | 0.03  | -0.23 | -0.23 | 0.40  | 0.06  | 0.08  | 0.40  | aa |
| AILAE | 7 | 60  | S7_110029797 - S7_119718788 | 8  | 175 | S8_176950316 - S8_177160597   | 6.0 | 7.4 | -0.03 | 0.16  | 0.47  | 0.35  | -0.32 | -0.20 | -0.20 | -0.63 | dd |
| AILAE | 8 | 15  | S8_3988651 - S8_4715013     | 10 | 35  | S10_5605708 - S10_7375307     | 5.1 | 5.5 | -0.13 | -0.15 | -0.45 | -0.44 | 0.18  | 0.36  | 0.28  | 0.79  | dd |

Notes: PH, plant height; EH, ear height; PHAE, plant height above-ear; TL, tassel length; AENN, above-ear node number; AILAE, average internode length above-ear. Chr. chromosome; Pos., position; PVE, phenotypic variance explained the QTL; Add, additive effect; Dom, dominance effect; Add., additive effect; Dom. dominance effect; aa, additive-by-additive effect; ad, additive-by-dominance effect; dd, dominance-by- dominance effect. Negative and positive values in add. and dom. indicates the effects are from the parent Zheng58 and PH6WC, respectively.
